# Supplementary material for: Lipid- and phospho-regulation of CTP:Phosphocholine Cytidylyltransferase α association with nuclear lipid droplets
Source: PubMed Central journal article supplement — Mol Biol Cell. 2024 Jan 29;35(3):ar33. doi: 10.1091/mbc.E23-09-0354 (PMC10916874; doi:10.1091/mbc.e23-09-0354), 2024-01-29
Supplement: mbc-35-ar33-s001.pdf [file mbc-35-ar33-s001.pdf]

# Supplemental Materials

*Molecular Biology of the Cell*

Foster *et al.*

Supplemental Figure 1

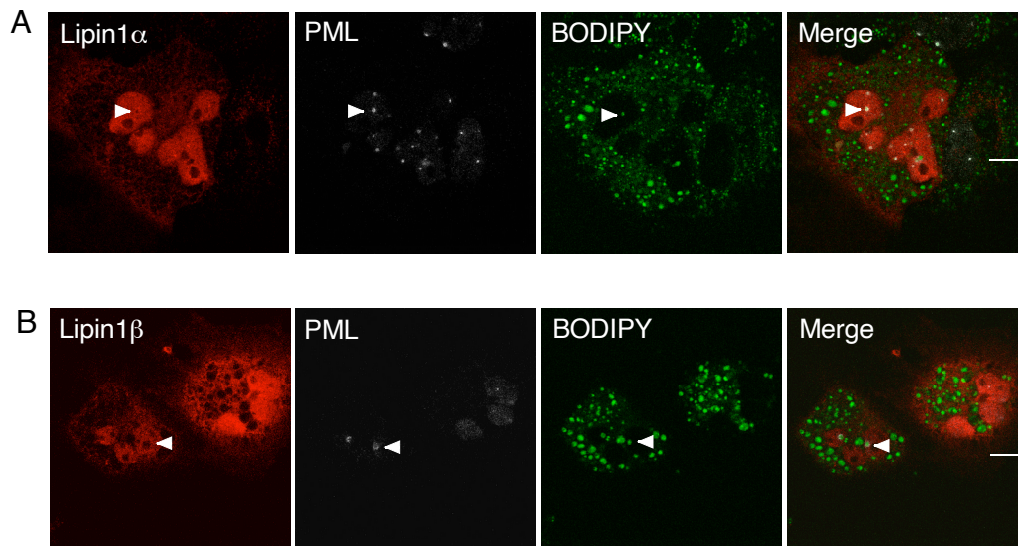

Supplemental Figure 1. **Lipin1 $\alpha$  and 1 $\beta$  do not localize to palmitate-induced nLDs or LAPS.** Huh7 cells transiently expressing V5-tagged Lipin1 $\alpha$  (panel A) or Lipin1 $\beta$  (panel B) were immunostained V5 and PML. LDs were visualized with BODIPY493/503 (bar, 10  $\mu$ m).

Supplementary Figure 2

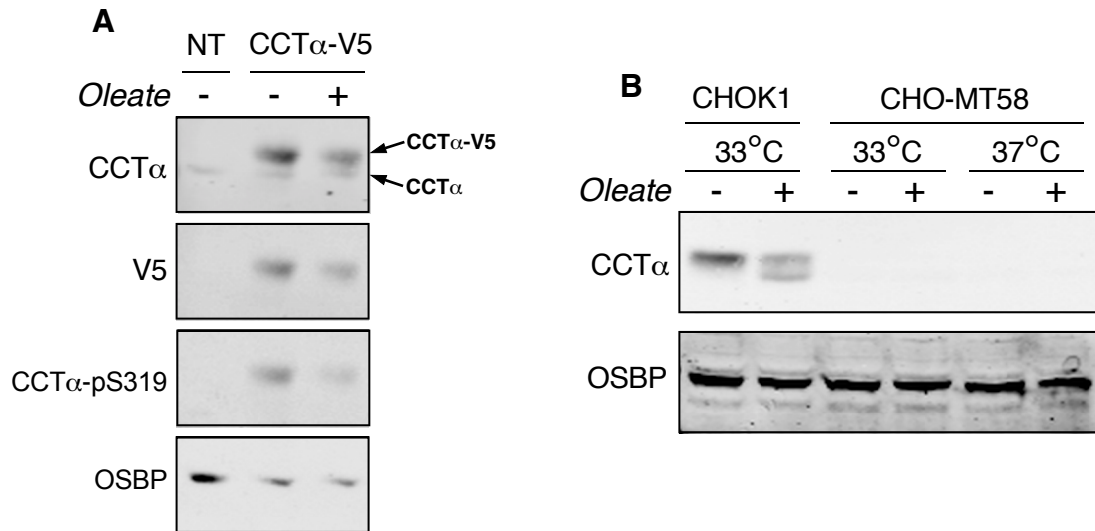

Supplemental Figure 2. **CCT $\alpha$  expression in U2OS and MT58 cells.** A, Immunoblot of non-transfected (NT) and U2OS cells expressing CCT-V5 treated with or without oleate for 24 h. B, expression of endogenous CCT $\alpha$  in MT58 cells cultured with and without oleate at the permissive (33°C) and non-permissive (37°C) temperature.

**Supplemental Figure 3**

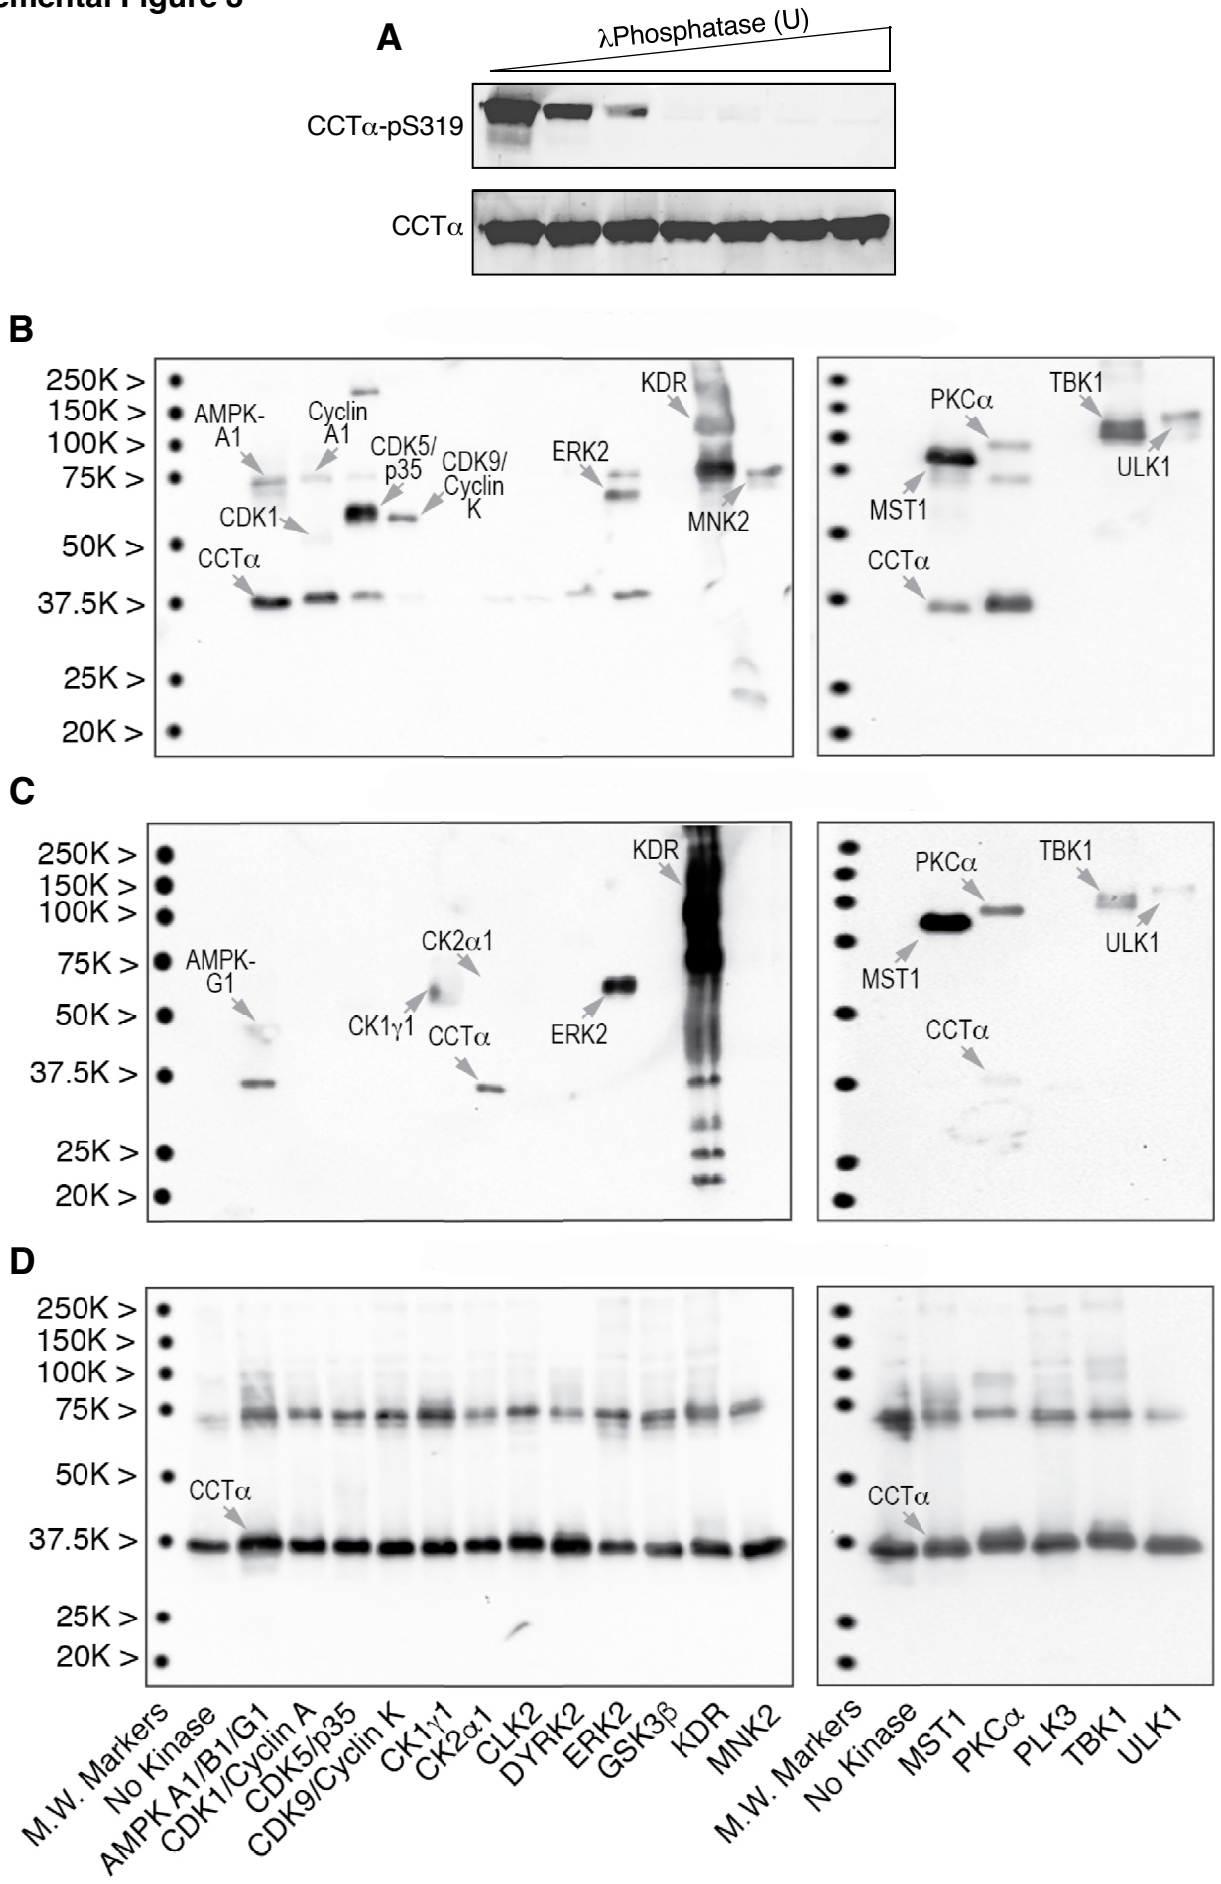

Supplemental Figure 3. **Immunoblot of CCT $\alpha$  phosphorylation by candidate kinases.** A, recombinant rat CCT $\alpha$  (20  $\mu$ g) was incubated with 0-400U of  $\lambda$ phosphatase for 1 hour at 30°C followed by immunoblotting for pS319 and CCT $\alpha$  protein. B, C and D complete immunoblots from Figure 10A that were probed with antibodies against pS319 (panel B), pY359/pS362 (panel C) and CCT $\alpha$  (panel D) showing the presence of other phosphorylated kinases and activator proteins used in the *in vitro* screen.

Supplemental Table 1

| Primer ID     | Sequence                                    |
|---------------|---------------------------------------------|
| 1A CCT 2A fwd | CCCAAGCAGGCTCCCGCCGCCGCCCTACTCATGAGCGC      |
| 1A CCT 2A rev | GCGCTCATGAGTAGGGGCGGCGGGGAGCCTGCTTGGG       |
| 1D CCT 2D fwd | GCTGCAGGCCATCGATCCCAAGCAGGCATCCTACGACGACCCC |
| 1D CCT 2D rev | GGGGTCGTCGTCGGGATCCTGCTTGGGATCGATGGCCTGCAGC |
| CCT 2A fwd    | CCCAAGCAGAGTCCCGCCGCCGCCCTACTCATGAGCGC      |
| CCT 2A rev    | GCGCTCATGAGTAGGGGCGGCGGGGACTCTGCTTGGG       |
| CCT 2D fwd    | CCCAAGCAGAGTCCCGACGACGACCCTACTCATGAGCGC     |
| CCT 2D rev    | GCGCTCATGAGTAGGGTCGTCGTCGGGACTCTGCTTGGG     |
| CCT 3A fwd    | CTCATGAGCGCGCCCCCGCCCCGCCTTTCGGTGGCCC       |
| CCT 3A rev    | GGGCCACCGAAAGGCGGGGGCGGGGGCGCGCTCATGAG      |
| CCT 3D fwd    | CTCATGAGCGCGACCCCGACCCGACTTTCGGTGGCCC       |
| CCT 3D rev    | GGGCCACCGAAAGTCGGGGTCGGGGTCGCGCTCATGAG      |
| CCT 4A fwd    | GGCAAGACTTCCCCAGCTGCCGCCCCAGCAAGTCTCTCTAGG  |
| CCT 4A rev    | CCTAGAGAGACTTGCTGGGGCGGCAGCTGGGGAAGTCTTGCC  |
| CCT 4D fwd    | GGCAAGACTTCCCCAGATGACGACCCAGCAAGTCTCTCTAGG  |
| CCT 4D rev    | CCTAGAGAGACTTGCTGGGTCGTCATCTGGGGAAGTCTTGCC  |

Supplemental Table 2

| <b>Candidate Kinase</b> | <b>SignalChem<br/>Cat No.</b> |
|-------------------------|-------------------------------|
| AMPK (A1/B1/G1)         | P47-10H                       |
| CDK1/cyclinA            | C22-18BG                      |
| CDK5/p35                | C33-10BG                      |
| CDK9/CyclinK            | C40-10G                       |
| CK1-gamma 1             | C68-11G                       |
| CK2 alpha 1             | C70-10G                       |
| CLK2                    | C58-11G                       |
| DYRK2                   | D10-10G                       |
| ERK2                    | M28-10G                       |
| GSK3-beta               | G09-10G                       |
| KDR                     | K01-11G                       |
| MNK2                    | M55-10G                       |
| MST1                    | S25-10G                       |
| PKC-alpha               | P61-18G                       |
| PLK3                    | P43-13G                       |
| TBK1                    | T02-10G                       |
| ULK1                    | U01-11G                       |
